# Supplementary material for: Identification, characterization and application of a new peptide against anterior gradient homolog 2 (AGR2)
Source: PubMed Central journal article supplement (PMC6007958; doi:10.18632/oncotarget.25221), 2018-06-08
Supplement: oncotarget-09-27363-s001.pdf [file oncotarget-09-27363-s001.pdf]

## Identification, characterization and application of a new peptide against anterior gradient homolog 2 (AGR2)

### SUPPLEMENTARY MATERIALS

**A**

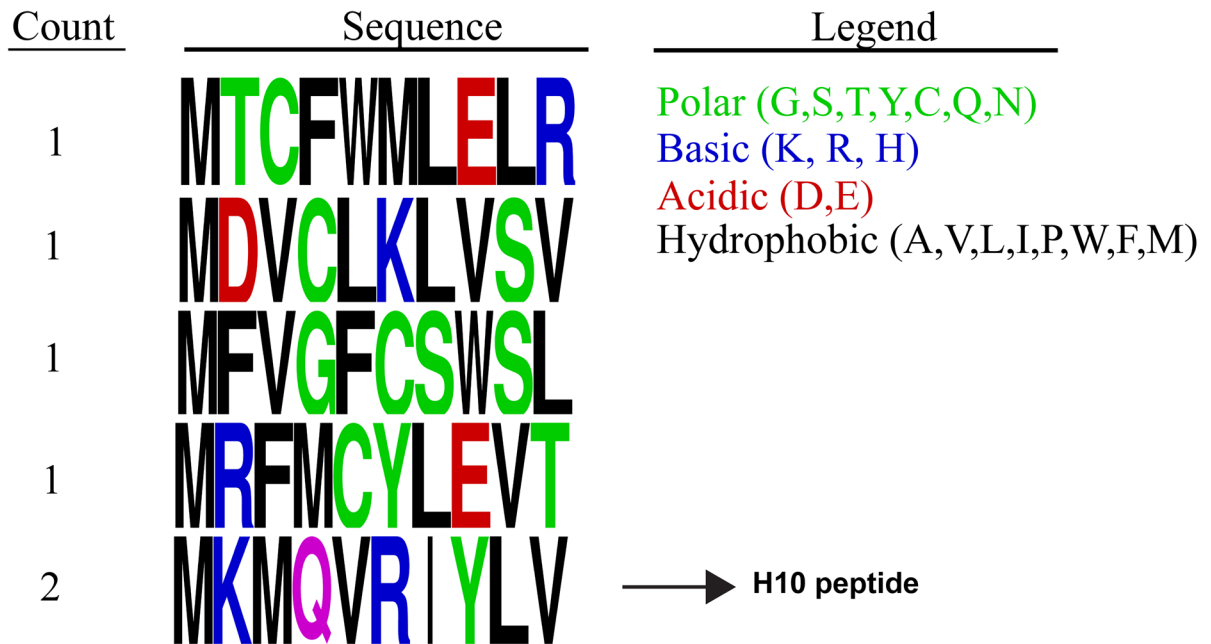

**B**

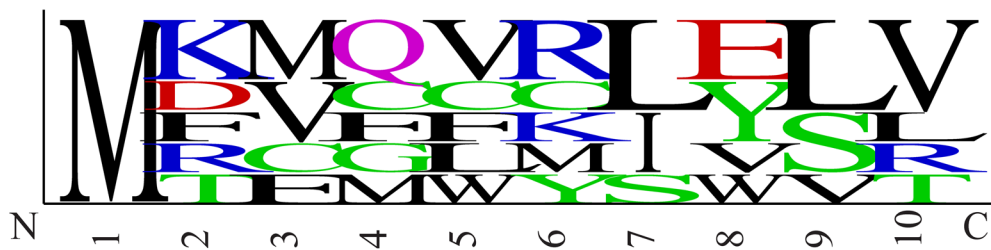

**Supplementary Figure 1: TOPO sequencing of mRNA peptides after six rounds of selection. (A)** Five different 10 amino acid sequences were identified. H10 was identified twice. **(B)** Consensus sequence of all peptides.

Supplementary Table 1: Concentration of AGR2, H10, and cross linker.

See Supplementary File 1

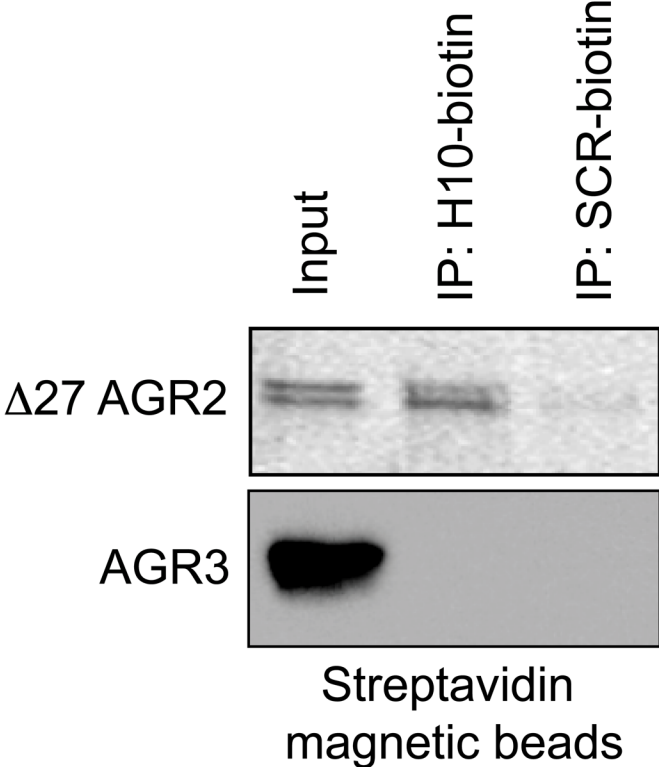

**Supplementary Figure 2: H10 interacts with AGR2, but not AGR3.** Pulldown assay of Δ27 AGR2 and AGR3 proteins with biotinylated H10 or scrambled peptide. Equal loading of the input and IP fractions was analyzed with SDS-PAGE and Western blot.

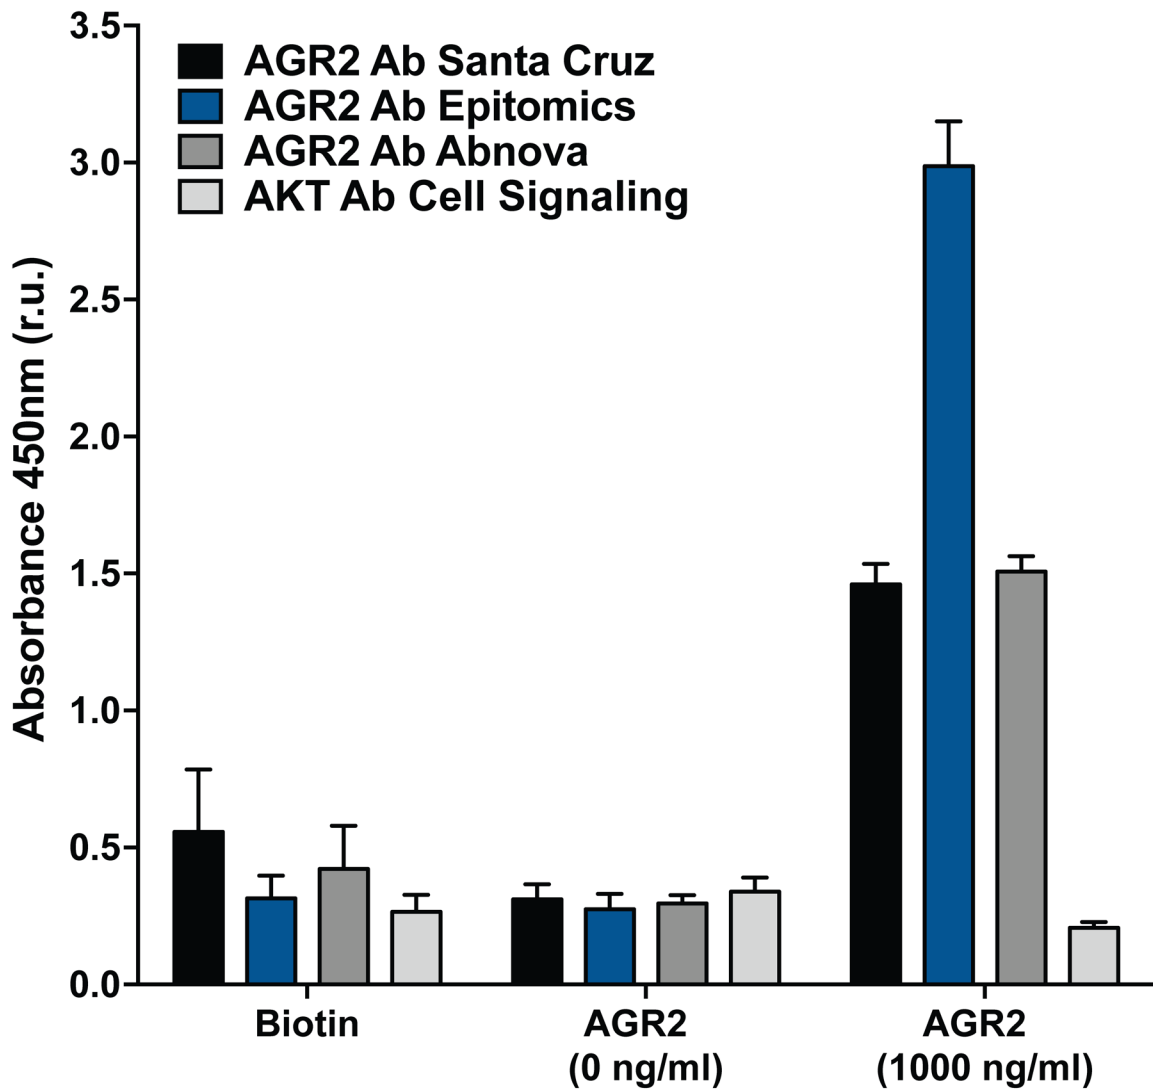

**Supplementary Figure 3: Comparison of three different commercially available AGR2 antibodies as detection antibody for H10 ELISA.** All three antibodies showed specific recognition of  $\Delta 27$  AGR2 compared to control. Epitomics antibody (No. 2574-1) had the highest sensitivity compared to Santa Cruz and Abcam antibodies. All data represent at least three independent biological replicates.

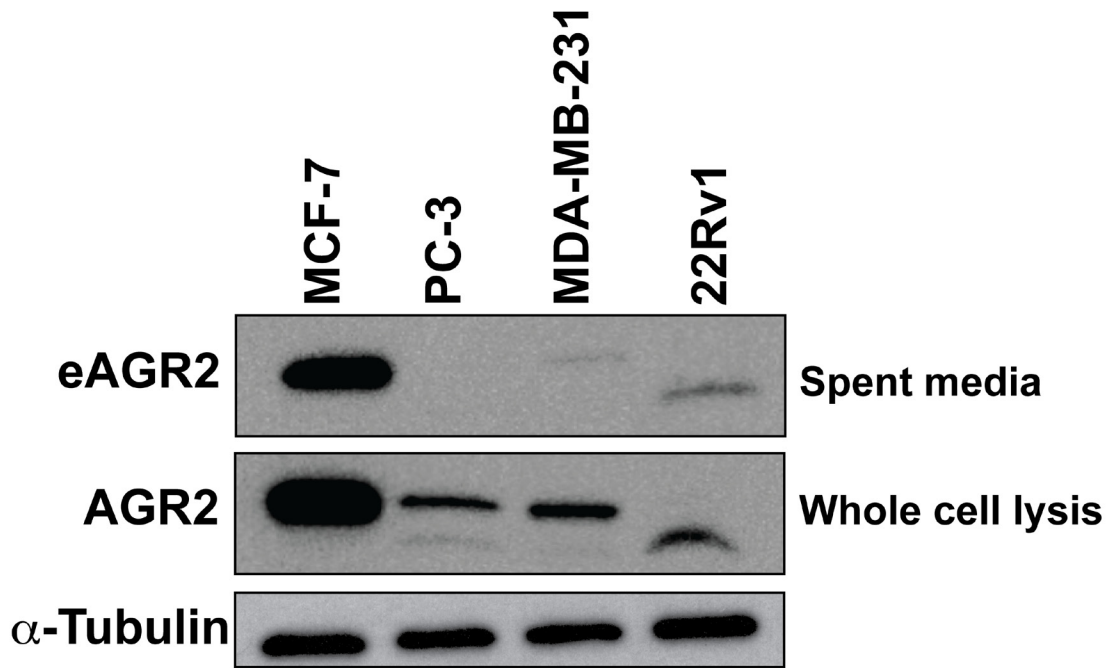

**Supplementary Figure 4: Analysis of endogenous eAGR2 and AGR2 levels.** AGR2 was detected by Western blot from cell lysates on MCF-7, PC-3, MDA-MB-231, 22Rv1 cell lines. eAGR2 detected from spent media by Bio-Dot SF Microfiltration System.

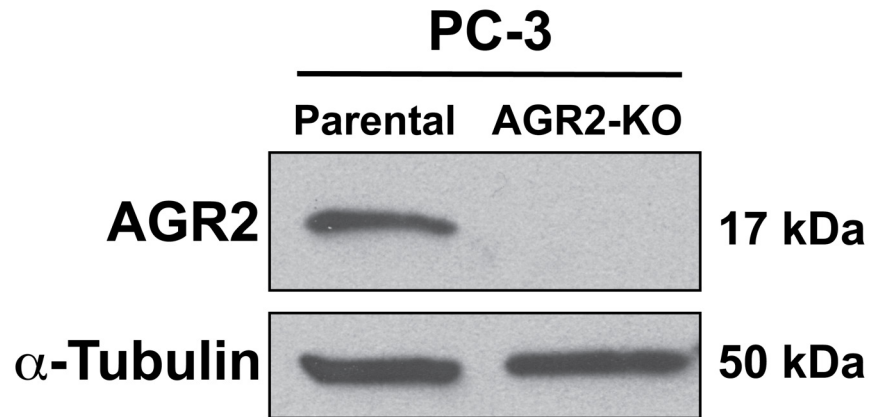

**Supplementary Figure 5: Confirmation of CRISPR/Cas9 AGR2 knockout in PC-3 cell line.** Western Blot analysis of AGR2 and  $\alpha$ -Tubulin in PC-3 cell line.

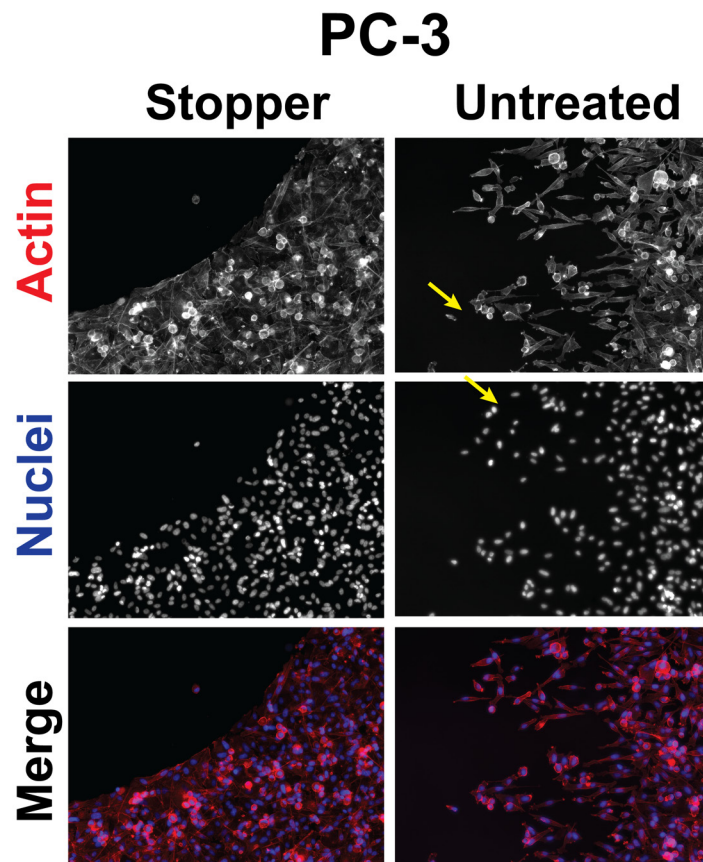

**Supplementary Figure 6: Migrating cells have elongated morphology.** Fluorescent microscopy images using Hoechst (blue) for nuclei stain and rhodamine phalloidin (red) for actin stain. One representative image is shown (4 repeats). Cells morphology resembles a stretching, indicating migration (examples under yellow arrows). All data represent at least three independent biological replicates. Scale bar represent 50 micrometers.

## $\Delta 27$ -AGR2

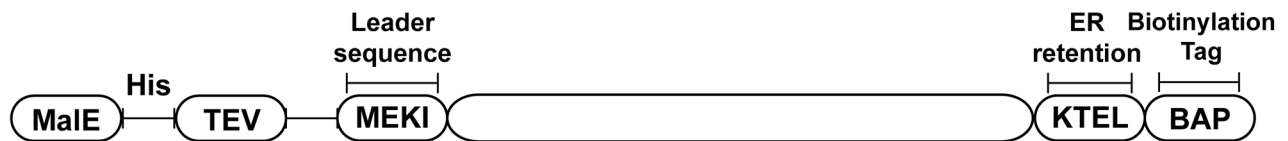

**Supplementary Figure 7: Schematic of expression AGR2 construct.** The cartoon of maltose binding protein (MalE) fuse with AGR2. TEV protease cleaves MalE and  $\Delta 27$  AGR2 is further purified by cation exchange.
